# Supplementary material for: Changing the double-pigtail stent by a new suture stent to improve patient’s quality of life: a prospective study
Source: PubMed Central journal article supplement (PMC4512273; doi:10.1007/s00345-014-1394-2), 2014-09-12
Supplement: 345_2014_1394_MOESM5_ESM.pdf [file 345_2014_1394_MOESM5_ESM.pdf]

# Comité de Protection des Personnes

## « Ile de France II »

**IRB registration # : 00001072**

**Bureau :**

Présidente : Marie-France MAMZER-BRUNEEL  
Vice-Président : Christian HERVE  
Secrétaires : Pierre COLONNA, Gérard PELE  
Trésorier : Stéphane DONNADIEU

**Membres :**

C. ARDIOT, J.-L. BRESSON, C. BROISSAND, J.-B. CHARPENTIER, G. CHATELLIER, P. COLONNA, B. DEBAECKER, N. DELSARTE, S. DONNADIEU, J. FAGARD, C. HERVE, L. LEBOUCHER, A. LEVY, M.-F. MAMZER-BRUNEEL, E. MARTINENT, O. PARENT de CURZON, M. PARISOT, G. PELE, R. QUERE, G. QUEVA, C. RAMBAUD, M.-C. REINMUND, M. RUDLER, P. VAN ES, G. VOGT

**Secrétariat :** Guillaume VOGT, Marie France MAMZER

PARIS, February 13<sup>th</sup> 2014

**Ref. 2014-02-02**

The French Ethical Committee, Comité de Protection des Personnes (CPP), Ile de France 2 (IDF2) **has approved** the submission of your project study entitled:

**“Pigtail Suture Stent: Decisive Progress Towards Double-Pigtail Stent Tolerance. A Prospective Study.”**

Principal Investigator :

**Docteur Benoît VOGT,**  
Former intern at the Paris Hospitals  
Former Assistant Chief of Clinic-Hospital of Paris  
Former Surgeon Hospitals of Paris  
**Surgeon Urologist**  
**Polyclinique de Blois**  
1, rue Robert Debré  
41260 LA CHAUSSÉE SAINT-VICTOR  
**Secrétariat : 02 54 90 65 60**  
**Cell : 06 63 22 08 44**  
**Email: benoitvogt@free.fr**

**This study has received the approval for Initial Review**

**This approval is based on its design that permit to consider it as a « study on current cares » according to the French law (Art. L 1121-1). In this study, the risks are insignificant and the benefits are those of the standard care.**

### IRB APPROVAL

Dr Marie-France MAMZER-BRUNEEL,  
Présidente du CPP IDF II
